# Supplementary material for: Comparative genomics of human Lactobacillus crispatus isolates reveals genes for glycosylation and glycogen degradation: implications for in vivo dominance of the vaginal microbiota
Source: Microbiome. 2019 Mar 29;7:49. doi: 10.1186/s40168-019-0667-9 (PMC6441167; doi:10.1186/s40168-019-0667-9)
Supplement: Supplementary file 2 — Transcripts of Lactobacillus crispatus glycosyltransferase gene fragments in vaginal samples of women treated for bacterial vaginosis. (XLSX 11 kb) [file 40168_2019_667_MOESM2_ESM.xlsx]

## Sheet: GT_frag_count
Data retrieved from Deng et al. 2018.
	Transcriptomics of vaginal samples from women treated for bacterial vaginosis.
	Multiple samples over time were taken per patient.
	Numbers represent counts per GT fragment or number of reads per bacterial species (indication of relative abundance of Lactobacillus crispatus).
GT_gene_frag and Lc	04_001_a	04_001_b	04_001_c	04_001_d	04_001_e	05_001_a	05_001_b	05_012_a	05_012_b	06_001_a	06_001_b	06_004_a	06_004_b	06_004_c	06_004_d	06_004_e	06_006_a	06_006_b	06_010_a	06_010_b	07_001_a	07_001_b	08_003_a	*08_003_b	08_006_a	*08_006_b	*08_006_c	*08_006_d	*08_006_e	13_019_a	13_019_b	13_019_c	13_019_d	13_019_e	13_022_a	13_022_b	15_006_a	15_006_b	17_004_a	17_004_b
Glycos_transf_2.1	0	0	0	0	0	0	0	0	0	0	0	0	0	2	0	2	0	0	0	0	0	0	0	1120	0	260	547	165	1716	0	0	0	0	0	0	0	0	0	0	0
Glycos_transf_2.2	0	0	0	0	0	0	0	0	0	0	0	0	0	0	0	0	0	0	0	0	0	0	0	145	0	0	4	1	47	0	0	0	0	0	0	0	0	0	0	0
Glycos_transf_2.3	0	0	0	0	0	0	0	0	0	0	0	0	0	0	0	0	0	0	0	0	0	0	0	18	0	0	13	0	23	0	0	0	0	0	0	0	0	0	0	0
Lactobacillus crispatus	942	793	779	1266	929	95	6	15	134	33	18	918	5716	13828	1495	23829	12	21	435	742	5	140	307	1607593	4228	6747824	9372972	4405826	5038186	1238	73	46	575	1	783	7572	124	222	74	126
All bacteria	23185126	1070722	7127418	5876592	20064342	24064200	19241154	22706490	4514816	15277336	16367188	20323720	2267310	23155436	6549432	15261396	13674238	17777742	27320954	3273278	21485214	19406768	20999078	3753282	24702246	14054494	20330814	11006906	10395970	20686314	14801660	8262258	14624272	3415266	26874222	2972712	22127456	21825702	15203644	26459330
* The vaginal microbiota of these two patients recovered to Lactobacillus crispatus-dominated microbiota following metronidazole treatment.
